# Supplementary material
Source: HighWire-hosted journal article supplement (http://www.jrheum.org/highwire/filestream/31227/field_highwire_adjunct_files/0/161099DataSuppl.pdf)
Supplement: 161099DataSuppl.pdf [file 161099DataSuppl.pdf]

## ONLINE SUPPLEMENTARY DATA

### Supplementary File 1. Additional MRI sequence information HOSTAS.

MRIs from the HOSTAS study included T1-weighted (T1w) fast spin echo (FSE) images in coronal and axial planes (TR/TE 575/11.2, slice thickness 2.0 and 3.0 mm, slice gap 0.2 and 0.3 mm), and T2w FSE images with frequency-selective fat-saturation in coronal and axial planes (TR/TE 3000/61.8, slice thickness 2.0 and 3.0 mm, slice gap 0.2 and 0.3 mm).

### Supplementary Table 1. Demographic and clinical characteristics of HOSTAS patients included in the reliability exercise (n=15).

|                                                           | Patients in exercise (n=15)* |
|-----------------------------------------------------------|------------------------------|
| <b>Women</b> , n (%)                                      | 12 (80%)                     |
| <b>Age</b> , mean (SD) years                              | 65.3 (9.0)                   |
| <b>Body mass index</b> , mean (SD) kg/m <sup>2</sup>      | 29.6 (5.4)                   |
| <b>Kellgren-Lawrence grade CMC-1†<sup>#</sup></b> , n (%) |                              |
| Grade 1                                                   | 5 (36%)                      |
| Grade 2                                                   | 5 (36%)                      |
| Grade 3                                                   | 3 (21%)                      |
| Grade 4                                                   | 1 (7%)                       |
| <b>Grip strength†</b> , mean (SD) kg                      | 23.4 (8.3)                   |
| <b>AUSCAN pain</b> , mean (SD) [0-20]                     | 8.9 (3.2)                    |
| <b>AUSCAN function</b> , mean (SD) [0-36]                 | 14.3 (5.5)                   |
| <b>VAS pain†</b> , mean (SD) [0-100]                      | 36.4 (20.6)                  |
| <b>Self-reported joint pain thumb†</b> , n(%)             | 11 (73%)                     |
| <b>Self-reported joint stiffness thumb†</b> , n(%)        | 7 (47%)                      |
| <b>Bony swelling CMC-1 joint†</b> , n (%)                 | 5 (33%)                      |
| <b>Tenderness on palpation CMC-1 joint†</b> , n(%)        | 7 (47%)                      |
| <b>Limited range of motion CMC-1†</b> , n(%)              | 4 (27%)                      |

\*Information only available for patients from the HOSTAS cohort. †Only data of the imaged hand are displayed. <sup>#</sup>Data from n=14 patients. AUSCAN, Australian/Canadian hand osteoarthritis index. CMC-1, first carpometacarpal. kg, kilogram. n, number. SD, standard deviation.

**Supplementary Table 2.** Intra-reader reliability of MRI features for the CMC-1 and STT joint (2 readers).

|                                 | <b>CMC-1 joint</b> |         |         | <b>STT joint</b> |         |         |
|---------------------------------|--------------------|---------|---------|------------------|---------|---------|
|                                 | SmICC              | PEA (%) | PCA (%) | SmICC            | PEA (%) | PCA (%) |
| <b>Synovitis</b>                | 0.53-0.83          | 65      | 90-95   | 0.72-0.89        | 65-90   | 100     |
| <b>Subchondral bone defects</b> | 0.89-0.89          | 95      | 100     | 0.62-0.70        | 90-95   | 100     |
| <b>Osteophytes</b>              | 0.71-0.73          | 60-70   | 100     | 0.44-0.71        | 90-100  | 100     |
| <b>Cartilage assessment</b>     | 0.61-0.86          | 75      | 95-100  | 0.71-0.84        | 65-70   | 100     |
| <b>Subluxation</b>              | 0.53-0.91          | 80-95   |         |                  |         |         |
| <b>Bone marrow lesions</b>      | 0.98-0.96          | 100     | 100     | 0.87-0.92        | 95      | 100     |

Values of both readers shown separately (lowest-highest), unless values were not different. Separate scores for the distal and proximal part of the joint were combined into a single sum score per joint to calculate ICCs. CI, confidence interval. CMC-1, first carpometacarpal. IQR, interquartile range. MRI, magnetic resonance imaging. N, number. PCA, percent close agreement. PEA, percent exact agreement. SmICC, single measure intra-class correlation coefficient. STT, scaphotrapeziotrapezoid.
